# Supplementary material for: Sex‐Specific Genetically Predicted Iron Status in relation to 12 Vascular Diseases: A Mendelian Randomization Study in the UK Biobank
Source: Hindawi journal article supplement (doi:10.1155/2020/6246041), 2020-01-01
Supplement: f1 [file 6246041.f1.pdf]

**Table S1. Characteristics of SNPs associated with iron status.**

| CHR | SNP       | BP       | Nearest Gene          | EA | OA | EAF   | Phenotype     | Beta   | SE    | p value   |
|-----|-----------|----------|-----------------------|----|----|-------|---------------|--------|-------|-----------|
| 6   | rs1800562 | 26093141 | <i>HFE(C282Y)</i>     | A  | G  | 0.067 | Iron          | 0.328  | 0.016 | 2.72E-97  |
|     |           |          |                       |    |    |       | Ferritin(log) | 0.204  | 0.016 | 1.54E-38  |
|     |           |          |                       |    |    |       | Transferrin   | -0.479 | 0.016 | 8.90E-196 |
|     |           |          |                       |    |    |       | Saturation    | 0.577  | 0.016 | 2.19E-270 |
| 6   | rs1799945 | 26091179 | <i>HFE(H63D)</i>      | C  | G  | 0.850 | Iron          | -0.189 | 0.010 | 1.10E-81  |
|     |           |          |                       |    |    |       | Ferritin(log) | -0.065 | 0.010 | 1.71E-10  |
|     |           |          |                       |    |    |       | Transferrin   | 0.114  | 0.010 | 9.36E-30  |
|     |           |          |                       |    |    |       | Saturation    | -0.231 | 0.010 | 5.13E-109 |
| 22  | rs855791  | 37462936 | <i>TMPRSS6(V736A)</i> | A  | G  | 0.446 | Iron          | -0.181 | 0.007 | 1.32E-139 |
|     |           |          |                       |    |    |       | Ferritin(log) | -0.055 | 0.007 | 1.38E-14  |
|     |           |          |                       |    |    |       | Transferrin   | 0.044  | 0.007 | 1.98E-09  |
|     |           |          |                       |    |    |       | Saturation    | -0.190 | 0.008 | 6.41E-137 |

CHR, chromosome; SNP, single-nucleotide polymorphism; EA, Effect allele; OA, Other allele; EAF, frequency of effect allele.

**Table S2. General information of vascular disease outcomes in UK Biobank.**

| <b>Outcome</b>                      | <b>Number of cases</b> | <b>Number of controls</b> | <b>Number of individuals</b> | <b>Source</b> |
|-------------------------------------|------------------------|---------------------------|------------------------------|---------------|
| Coronary atherosclerosis            | 14334                  | 346860                    | 361194                       | finngen       |
| Varicose veins of lower extremities | 8763                   | 352431                    | 361194                       | icd10         |
| Deep vein thrombosis                | 6795                   | 354399                    | 361194                       | phesant       |
| Phlebitis and thrombophlebitis      | 2289                   | 358905                    | 361194                       | icd10         |
| Pulmonary embolism                  | 2118                   | 359076                    | 361194                       | icd10         |
| Peripheral artery disease           | 1230                   | 359964                    | 361194                       | finngen       |
| Aortic aneurysm                     | 589                    | 360605                    | 361194                       | finngen       |
| Atherosclerosis                     | 566                    | 360628                    | 361194                       | icd10         |
| Arterial embolism and thrombosis    | 510                    | 360684                    | 361194                       | icd10         |
| Cerebral aneurysm                   | 225                    | 360969                    | 361194                       | finngen       |
| Varicose veins of other sites       | 222                    | 360972                    | 361194                       | icd10         |
| Dissection of aorta                 | 129                    | 361065                    | 361194                       | finngen       |

icd10, generated from UK Biobank fields 41202-0.0 - 41202-0.379.

finngen, manually curated by collaborators in the FinnGen research project.

phesant, automatically processed using a modified version of the software PHESANT (<https://www.ncbi.nlm.nih.gov/pubmed/29040602>).

**Table S3. Association of iron biomarkers with other 5 vascular disease outcomes in UK Biobank.**

| Outcome and Exposure          | Iron               |                | Ferritin           |                | Transferrin        |                | Saturation         |                |
|-------------------------------|--------------------|----------------|--------------------|----------------|--------------------|----------------|--------------------|----------------|
|                               | OR(95%CI)          | <i>p</i> value | OR(95%CI)          | <i>p</i> value | OR(95%CI)          | <i>p</i> value | OR(95%CI)          | <i>p</i> value |
| Varicose veins of other sites | 1.000(0.999,1.000) | 0.68           | 1.000(0.999,1.001) | 0.76           | 1.000(0.999,1.000) | 0.44           | 1.000(1.000,1.000) | 0.95           |
| Deep vein thrombosis          | 0.943(0.851,1.045) | 0.26           | 0.866(0.694,1.080) | 0.20           | 1.067(0.961,1.185) | 0.23           | 0.956(0.889,1.028) | 0.22           |
| Aortic aneurysm               | 1.000(1.000,1.001) | 0.14           | 1.001(1.000,1.002) | 0.15           | 1.000(0.999,1.000) | 0.23           | 1.000(1.000,1.001) | 0.15           |
| Cerebral aneurysm             | 1.000(1.000,1.000) | 0.79           | 1.000(0.999,1.001) | 0.62           | 1.000(1.000,1.001) | 0.44           | 1.000(1.000,1.000) | 0.64           |
| Dissection of aorta           | 1.000(1.000,1.000) | 0.85           | 1.000(0.999,1.001) | 0.78           | 1.000(1.000,1.000) | 0.75           | 1.000(1.000,1.000) | 0.80           |

OR, odds ratio; CI, confidence interval.

**Table S4. Association of genetically predicted iron status with vascular disease outcomes in sensitivity analyses.**

|                                     | Method          | Iron               |         | Ferritin           |         | Transferrin        |         | Saturation         |         |
|-------------------------------------|-----------------|--------------------|---------|--------------------|---------|--------------------|---------|--------------------|---------|
|                                     |                 | OR(95% CI)         | P-value | OR(95% CI)         | P-value | OR(95% CI)         | P-value | OR(95% CI)         | p value |
| Varicose veins of lower extremities | Simple median   | 1.006(1.003,1.010) | 1.4E-04 | 1.011(1.003,1.019) | 0.01    | 0.988(0.980,0.996) | 4.3E-03 | 1.004(1.001,1.006) | 1.5E-03 |
|                                     | Weighted median | 1.006(1.003,1.009) | 2.0E-04 | 1.011(1.004,1.017) | 7.3E-04 | 0.995(0.992,0.997) | 1.2E-04 | 1.004(1.002,1.006) | 3.4E-04 |
|                                     | MR-Egger        | 1.009(0.998,1.020) | 0.10    | 1.009(0.999,1.020) | 0.09    | 0.997(0.993,1.000) | 0.06    | 1.004(1.000,1.007) | 0.07    |
| Varicose veins of other sites       | Simple median   | 1.000(0.999,1.000) | 0.36    | 0.999(0.997,1.001) | 0.33    | 1.001(1.000,1.003) | 0.13    | 1.000(0.999,1.000) | 0.33    |
|                                     | Weighted median | 1.000(0.999,1.000) | 0.68    | 1.000(0.999,1.001) | 0.64    | 1.000(0.999,1.000) | 0.47    | 1.000(1.000,1.000) | 0.87    |
|                                     | MR-Egger        | 1.002(1.000,1.003) | 0.06    | 1.002(1.000,1.003) | 0.07    | 0.999(0.999,1.000) | 0.16    | 1.001(1.000,1.001) | 0.11    |
| Phlebitis and thrombophlebitis      | Simple median   | 0.999(0.997,1.001) | 0.40    | 0.997(0.991,1.003) | 0.37    | 1.003(0.998,1.007) | 0.26    | 0.999(0.997,1.001) | 0.36    |
|                                     | Weighted median | 1.000(0.998,1.002) | 0.94    | 1.002(0.999,1.005) | 0.18    | 0.998(0.997,1.000) | 0.04    | 1.001(0.999,1.002) | 0.36    |
|                                     | MR-Egger        | 1.008(1.003,1.014) | 3.0E-03 | 1.008(1.003,1.013) | 3.1E-03 | 0.997(0.995,0.999) | 0.01    | 1.003(1.001,1.005) | 3.5E-03 |
| Deep vein thrombosis                | Simple median   | 0.925(0.814,1.052) | 0.23    | 0.839(0.621,1.133) | 0.25    | 1.078(0.893,1.301) | 0.44    | 0.940(0.855,1.033) | 0.20    |
|                                     | Weighted median | 0.918(0.814,1.035) | 0.16    | 0.835(0.657,1.061) | 0.14    | 1.065(0.956,1.187) | 0.25    | 0.939(0.867,1.018) | 0.12    |
|                                     | MR-Egger        | 0.818(0.523,1.278) | 0.38    | 0.822(0.525,1.287) | 0.39    | 1.061(0.894,1.258) | 0.50    | 0.931(0.777,1.115) | 0.44    |
| Atherosclerosis                     | Simple median   | 1.000(0.999,1.001) | 0.91    | 1.000(0.998,1.002) | 0.94    | 1.000(0.999,1.001) | 0.96    | 1.000(0.999,1.001) | 0.93    |
|                                     | Weighted median | 1.000(0.999,1.001) | 0.84    | 1.000(0.998,1.002) | 0.98    | 1.000(0.999,1.001) | 0.92    | 1.000(0.999,1.001) | 0.99    |
|                                     | MR-Egger        | 0.999(0.997,1.002) | 0.68    | 0.999(0.997,1.002) | 0.67    | 1.000(0.999,1.001) | 0.62    | 1.000(0.999,1.001) | 0.65    |
| Coronary atherosclerosis            | Simple median   | 0.994(0.990,0.999) | 0.01    | 0.984(0.970,0.998) | 0.02    | 1.009(0.999,1.019) | 0.07    | 0.995(0.992,0.999) | 0.02    |
|                                     | Weighted median | 0.994(0.991,0.998) | 3.1E-03 | 0.992(0.985,0.999) | 0.03    | 1.002(0.999,1.006) | 0.15    | 0.997(0.995,1.000) | 0.02    |
|                                     | MR-Egger        | 1.003(0.991,1.016) | 0.63    | 1.003(0.991,1.015) | 0.63    | 0.999(0.995,1.003) | 0.62    | 1.001(0.996,1.006) | 0.62    |
| Arterial embolism and thrombosis    | Simple median   | 1.000(0.999,1.001) | 0.49    | 0.999(0.998,1.001) | 0.58    | 1.000(0.999,1.002) | 0.72    | 1.000(0.999,1.000) | 0.52    |
|                                     | Weighted median | 1.000(0.999,1.000) | 0.47    | 1.000(0.998,1.001) | 0.54    | 1.000(1.000,1.001) | 0.48    | 1.000(0.999,1.000) | 0.51    |
|                                     | MR-Egger        | 0.999(0.997,1.002) | 0.51    | 0.999(0.997,1.002) | 0.51    | 1.000(0.999,1.001) | 0.47    | 1.000(0.999,1.001) | 0.49    |
| Pulmonary embolism                  | Simple median   | 1.000(0.998,1.002) | 0.94    | 1.000(0.996,1.004) | 0.96    | 1.000(0.997,1.003) | 0.98    | 1.000(0.999,1.001) | 0.95    |
|                                     | Weighted median | 1.000(0.999,1.002) | 0.79    | 1.000(0.997,1.003) | 0.89    | 1.000(0.999,1.002) | 0.80    | 1.000(0.999,1.001) | 0.89    |
|                                     | MR-Egger        | 1.000(0.992,1.008) | 0.97    | 1.000(0.992,1.008) | 0.98    | 1.000(0.997,1.003) | 0.93    | 1.000(0.997,1.003) | 0.98    |
| Aortic aneurysm                     | Simple median   | 1.001(1.000,1.001) | 0.15    | 1.001(0.999,1.003) | 0.34    | 1.000(0.998,1.001) | 0.52    | 1.000(1.000,1.001) | 0.27    |
|                                     | Weighted median | 1.001(1.000,1.001) | 0.11    | 1.001(0.999,1.003) | 0.21    | 1.000(0.999,1.000) | 0.31    | 1.000(1.000,1.001) | 0.19    |
|                                     | MR-Egger        | 1.001(0.998,1.003) | 0.63    | 1.001(0.998,1.003) | 0.64    | 1.000(0.999,1.001) | 0.71    | 1.000(0.999,1.001) | 0.67    |
| Cerebral aneurysm                   | Simple median   | 1.000(0.999,1.000) | 0.45    | 1.000(0.999,1.001) | 0.55    | 1.000(0.999,1.001) | 0.66    | 1.000(1.000,1.000) | 0.51    |
|                                     | Weighted median | 1.000(0.999,1.000) | 0.74    | 1.000(0.999,1.001) | 0.61    | 1.000(1.000,1.001) | 0.39    | 1.000(1.000,1.000) | 0.59    |
|                                     | MR-Egger        | 0.999(0.997,1.002) | 0.63    | 0.999(0.997,1.002) | 0.62    | 1.000(0.999,1.001) | 0.51    | 1.000(0.999,1.001) | 0.57    |
| Aortic dissection                   | Simple median   | 1.000(1.000,1.000) | 0.99    | 1.000(0.999,1.001) | 0.99    | 1.000(0.999,1.001) | 0.99    | 1.000(1.000,1.000) | 0.99    |
|                                     | Weighted median | 1.000(1.000,1.000) | 0.99    | 1.000(0.999,1.001) | 0.80    | 1.000(1.000,1.000) | 0.75    | 1.000(1.000,1.000) | 0.83    |
|                                     | MR-Egger        | 1.000(0.999,1.001) | 0.74    | 1.000(0.999,1.001) | 0.74    | 1.000(1.000,1.000) | 0.74    | 1.000(0.999,1.000) | 0.74    |
| Peripheral artery disease           | Simple median   | 1.000(0.999,1.001) | 0.81    | 1.000(0.996,1.003) | 0.76    | 1.001(0.998,1.003) | 0.61    | 1.000(0.999,1.001) | 0.77    |
|                                     | Weighted median | 1.000(0.999,1.001) | 0.94    | 1.000(0.998,1.002) | 0.84    | 1.000(0.999,1.001) | 0.78    | 1.000(0.999,1.001) | 0.91    |
|                                     | MR-Egger        | 1.001(0.997,1.005) | 0.52    | 1.001(0.997,1.005) | 0.53    | 1.000(0.998,1.001) | 0.58    | 1.000(0.999,1.002) | 0.55    |

OR, odds ratio; CI, confidence interval.
